# Supplementary material for: Hybrid Mass Spectrometry Approaches to Determine How L-Histidine Feedback Regulates the Enzyzme MtATP-Phosphoribosyltransferase
Source: PubMed Central journal article supplement (PMC5415358; doi:10.1016/j.str.2017.03.005), 2017-05-02
Supplement: mmc1.pdf [file mmc1.pdf]

**Structure, Volume 25**

**Supplemental Information**

**Hybrid Mass Spectrometry Approaches to Determine**

**How L-Histidine Feedback Regulates the Enzyme**

**MtATP-Phosphoribosyltransferase**

**Kamila J. Pacholarz, Rebecca J. Burnley, Thomas A. Jowitt, Victoria Ordsmith, João Pedro  
Pisco, Massimiliano Porrini, Gérald Larrouy-Maumus, Rachel A. Garlish, Richard J.  
Taylor, Luiz Pedro Sório de Carvalho, and Perdita E. Barran**

## Supplemental Information

### Hybrid Mass Spectrometry Approaches to Determine how L-Histidine Feedback Regulates the Enzyme MtATP-Phosphoribosyltransferase

Kamila J. Pacholarz<sup>1,2</sup>, Rebecca J. Burnley<sup>3</sup>, Thomas A. Jowitt<sup>4</sup>, Victoria Ordsmith<sup>2</sup>, João Pedro Pisco<sup>5</sup>, Massimiliano Porrini<sup>6</sup>, Gérald Larrouy-Maumus<sup>5,§</sup>, Rachel A. Garlish<sup>3</sup>, Richard J. Taylor<sup>3</sup>, Luiz Pedro Sório de Carvalho<sup>5\*</sup>, Perdita E. Barran<sup>1\*</sup>

<sup>1</sup>Michael Barber Centre for Collaborative Mass Spectrometry, Manchester Institute of Biotechnology, 131 Princess Street, M1 7DN & School of Chemistry, University of Manchester, Oxford Road, M13 9PL, Manchester, UK

<sup>2</sup>School of Chemistry, University of Edinburgh, David Brewster Road, EH9 3FJ, Edinburgh, UK

<sup>3</sup>Physical and Analytical Sciences Group, UCB, 216 Bath Road, SL1 4EN, Slough, UK

<sup>4</sup>The Biomolecular Analysis Facility, Faculty of Life Sciences, University of Manchester, Oxford Road, M13 9PT, Manchester, UK

<sup>5</sup>Mycobacterial Metabolism and Antibiotic Research Laboratory, The Francis Crick Institute, 1 Midland Road, NW1 1AT, London, UK

<sup>6</sup>ARNA Laboratory, Inserm U1212/CNRS UMR 5320/University of Bordeaux, France

<sup>1</sup>Lead Contact, [perdita.barran@manchester.ac.uk](mailto:perdita.barran@manchester.ac.uk)

## Supporting Data

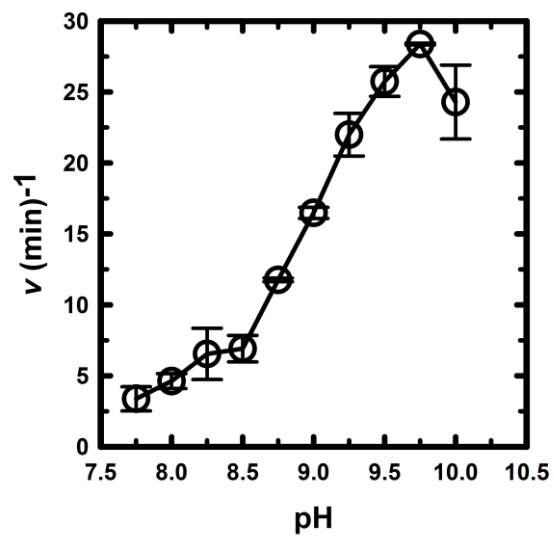

Figure S1. Related to Figure 1. MtATP-PRT activity pH dependence. Below pH 7.75, despite very slow, MtATP-PRT is still active.

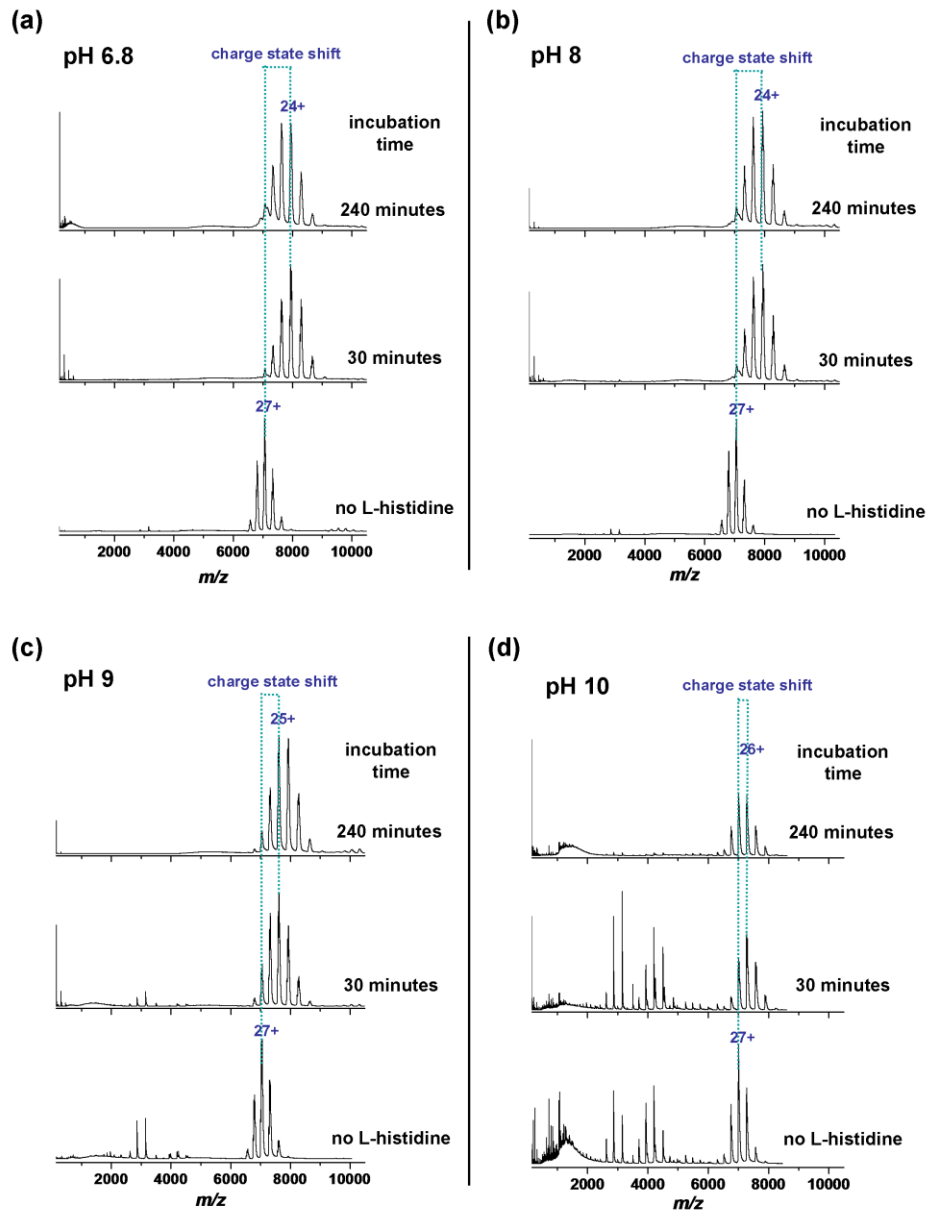

Figure S2. Related to Figure 2. nESI mass spectra of 20  $\mu$ M apo MtATP-PRT (hexamer concentration) and MtATP-PRT incubated with 12 equivalents of L-histidine for 30 minutes and 240 minutes in 100 mM ammonium acetate at (a) pH 6.8, (b) pH 8, (c) pH 9 and (d) pH 10, acquired on Ultima API US Q-ToF mass spectrometer (at cone voltage 268 V). Efforts to shift charge state distribution (CSD) to a higher  $m/z$  range by addition of charge reducing agents such as TEAA and EDDA (5) did not improve resolution sufficiently to determine the binding stoichiometry.

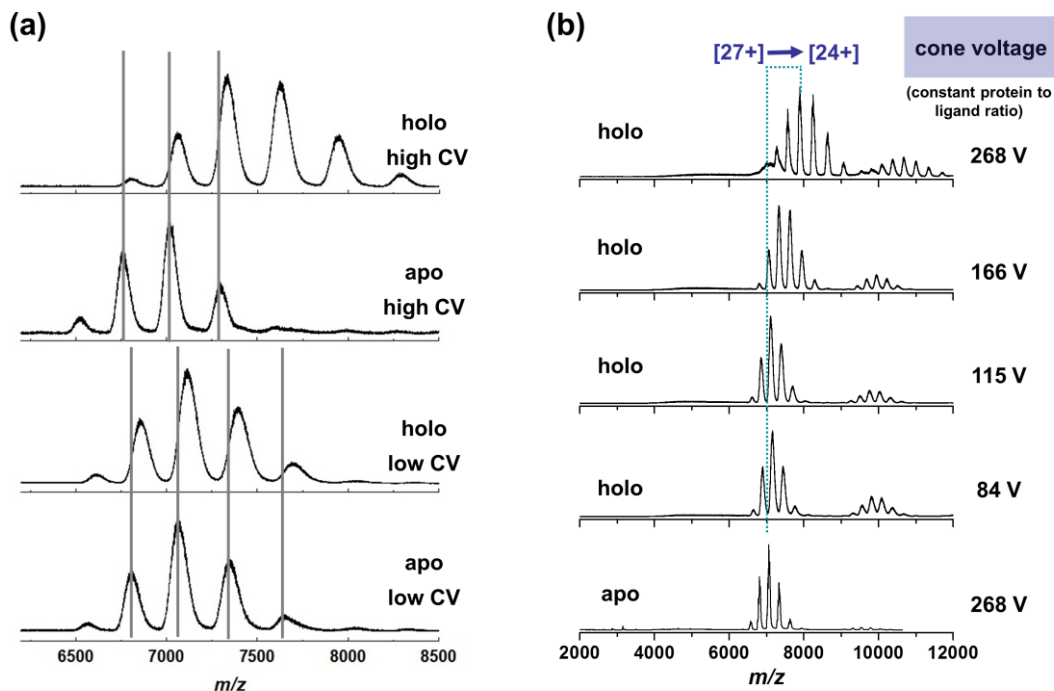

Figure S3. Related to Figure 3 . (a) Mass spectra of MtATP-PRT in the presence and absence of 12 equivalents of L-histidine (denoted as ‘holo’; 1 MtATP-PRT hexamer (H):12 ligand (L)) in 100 mM ammonium acetate at pH 6.8 at 115 V (low CV) and 166 V cone voltage (high CV), showing the mass shift associated with ligand binding. Moreover, a shift in the charge state envelope is noted at higher CV. Grey lines are used to help visualize the mass shift (based on apex of ‘no ligand’ peaks). (b) Dissociation of L-histidine upon increased cone voltage; 1 equivalent of MtATP-PRT incubated with 12 equivalents of L-histidine in 100 mM ammonium acetate pH 6.8 acquired at various cone voltages ranging from 84 – 268 V on Ultima API US Q-ToF mass spectrometer.

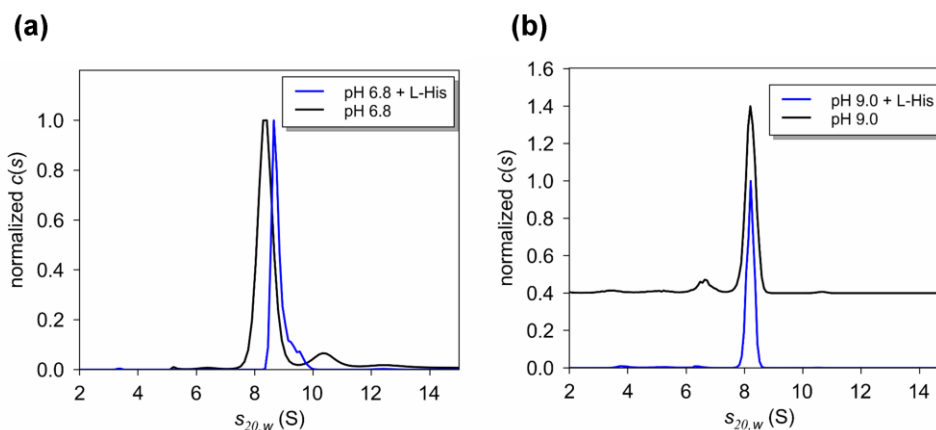

Figure S4. Related to Figure 2b. Sedimentation coefficient distributions ( $s_{20,w}$ ) of MtATP-PRT in 100 mM ammonium acetate at pH 6.8 (a) and pH 9 (b), in presence (blue trace) and in absence of L-histidine (black trace). More compact proteins experience less hydrodynamic friction, and thus have larger sedimentation coefficient.

**Table S1. Related to Figure 2b. Results from the bead modelling of the apo and holo forms of MtATP-PRT compared to the data from AUC measurements: sedimentation coefficient (S), diffusion coefficient (D), hydrodynamic radius ( $R_h$ ), radius of gyration ( $R_g$ ) and total bead surface area ( $A^b$ ).**

|                                          | Experimental |      | Bead model |      |
|------------------------------------------|--------------|------|------------|------|
|                                          | Apo          | Holo | Apo        | Holo |
| <b>S</b>                                 | 8.22         | 8.58 | 8.38       | 8.54 |
| <b>D (cm/sec<sup>2</sup>)</b>            | -            | -    | 4.50       | 4.54 |
| <b><math>R_h</math> (nm)</b>             | 5.49         | 5.25 | 4.76       | 4.72 |
| <b><math>R_g</math> (nm)</b>             | -            | -    | 3.75       | 3.75 |
| <b><math>f/f_0</math></b>                | 1.37         | 1.28 | 1.27       | 1.26 |
| <b><math>A^b</math> (nm<sup>2</sup>)</b> | -            | -    | 655        | 641  |

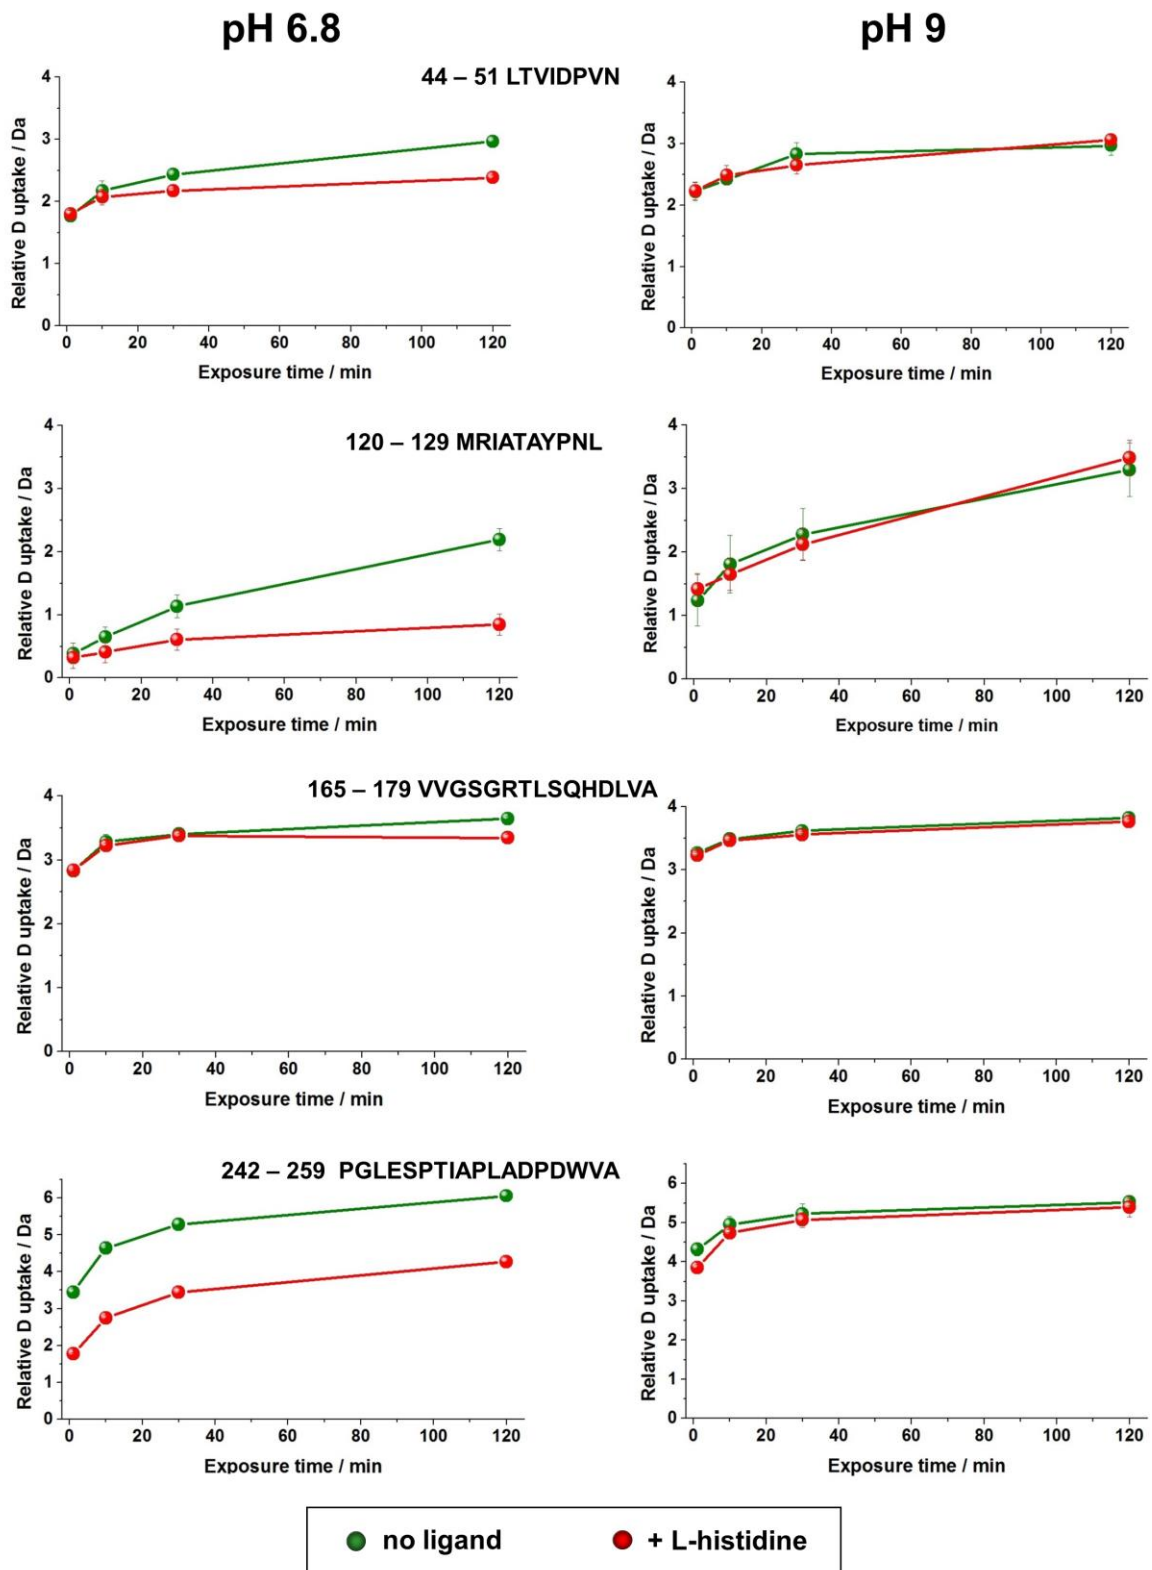

Figure S5. Related to Figure 4. Example deuterium uptake curves of four chosen peptides of MtATP-PRT in presence (red) and in absence (green) of L-histidine at pH 6.8 (left) and pH 9 (right). Deuterium uptake was determined at four exposure time points: 1 minute, 10 minutes, 30 minutes and 120 minutes. D uptake data for all peptides identified is provided below.

(a) pH 6.8

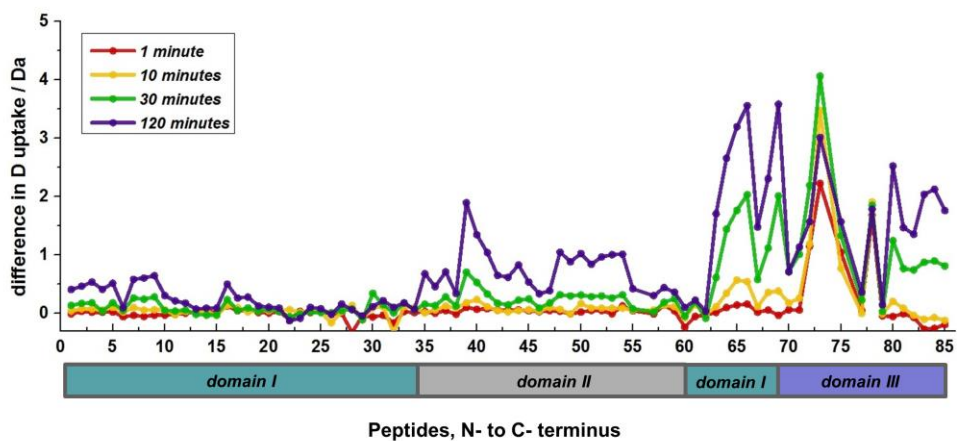

(b) pH 9

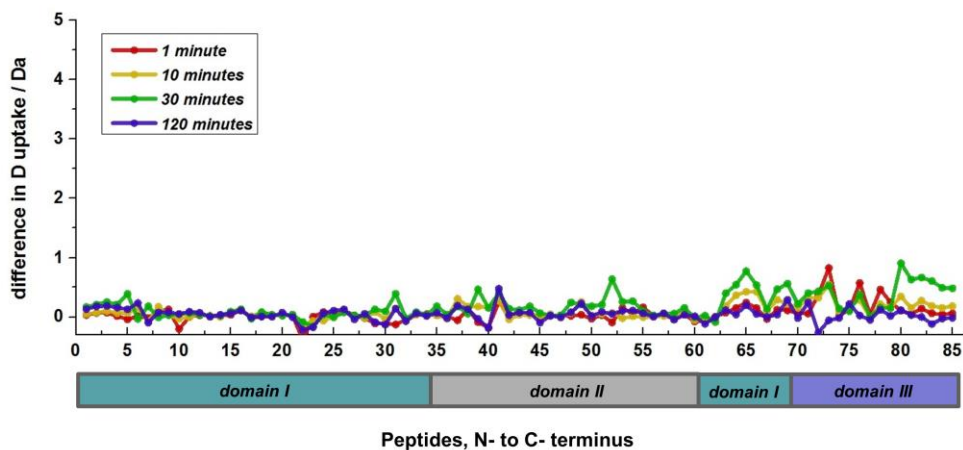

Figure S6. Related to Figure 4. Difference in the absolute D uptake between L-histidine free and L-histidine bound MtATP-PRT at pH 6.8 (a) and pH 9 (b), measured at four deuterium exposure time points: 1 minute (red), 10 minutes (yellow), 30 minutes (green) and 120 minutes (blue); providing information about regions of ligand binding and conformational changes.



**Table S2. Related to Figure 4. List of MtATP-PRT residues with altered D uptake due to L-histidine binding determined via HDX experiments; along with list of MtATP-PRT involved in binding with L-histidine, AMP and residues predicted to interact with ATP and PRPP.**

| <b>HDX DATA</b>                       |                                                            |                       |
|---------------------------------------|------------------------------------------------------------|-----------------------|
| <b>Residues</b>                       | <b>Change in D uptake</b>                                  | <b>Peptide number</b> |
| L44-F55                               | long time scale: 120 min                                   | 7-9                   |
| L117-L129                             | intermediate time scale: 30 min                            | 39-41                 |
| V130-E151                             | intermediate and long time scale: 30-120 min               | 44-45                 |
| I152-D164                             | intermediate and long time scale: 30-120 min               | 48-53                 |
| V210-L234                             | intermediate and long time scale: 30-120 min (significant) | 63-71                 |
| D226-A259                             | instant within 1 minute                                    | 72, 73, 75, 78        |
| Y227-K235                             | intermediate and long time scale: 30-120 min               | 74                    |
| V258-L285                             | intermediate and long time scale: 30-120 min               | 80-85                 |
| <b>X-RAY CRYSTALLOGRAPHY DATA (6)</b> |                                                            |                       |
| <b>Residues (HDX numbering)</b>       | <b>Type of interaction</b>                                 |                       |
| D228, L244, S246, T248, L263, A283    | L-histidine                                                |                       |
| D40, D43, D80, S100, Y126, D164-T171  | AMP                                                        |                       |
| K19, K42, R59, R170                   | ATP and PRPP (predicted)                                   |                       |

**Table S3a. Related to Figure 4. List of MtATP-PRT peptides identified after digestion with pepsin.**

| peptide # | Start residue | End residue | Maximum D uptake | Sequence            |
|-----------|---------------|-------------|------------------|---------------------|
| 1         | 12            | 27          | 13               | LRVAVPNKGALSEPAT    |
| 2         | 12            | 28          | 14               | LRVAVPNKGALSEPATE   |
| 3         | 12            | 30          | 16               | LRVAVPNKGALSEPATEIL |
| 4         | 13            | 28          | 13               | RVAVPNKGALSEPATE    |
| 5         | 13            | 30          | 15               | RVAVPNKGALSEPATEIL  |
| 6         | 29            | 35          | 6                | ILAEAGY             |
| 7         | 44            | 51          | 6                | LTVIDPVN            |
| 8         | 44            | 52          | 7                | LTVIDPVNN           |
| 9         | 44            | 55          | 10               | LTVIDPVNNVEF        |
| 10        | 45            | 55          | 9                | TVIDPVNNVEF         |
| 11        | 46            | 55          | 8                | VIDPVNNVEF          |
| 12        | 47            | 55          | 7                | IDPVNNVEF           |
| 13        | 56            | 62          | 5                | FFLRPKD             |
| 14        | 56            | 64          | 7                | FFLRPKDIA           |
| 15        | 57            | 65          | 7                | FLRPKDIAI           |
| 16        | 63            | 71          | 8                | IAIYVGSGE           |
| 17        | 63            | 73          | 10               | IAIYVGSGELD         |
| 18        | 63            | 74          | 11               | IAIYVGSGELDF        |
| 19        | 65            | 74          | 9                | IYVGSGELDF          |
| 20        | 66            | 73          | 7                | YVGSGELD            |
| 21        | 66            | 74          | 8                | YVGSGELDF           |
| 22        | 66            | 80          | 14               | YVGSGELDFGITGRD     |
| 23        | 67            | 80          | 13               | VGSSELDFGITGRD      |
| 24        | 72            | 80          | 8                | LDFGITGRD           |
| 25        | 73            | 79          | 6                | DFGITGR             |
| 26        | 73            | 80          | 7                | DFGITGRD            |
| 27        | 81            | 88          | 7                | LVCDSGAQ            |
| 28        | 81            | 91          | 10               | LVCDSGAQVRE         |
| 29        | 84            | 93          | 9                | DSGAQVRERL          |
| 30        | 89            | 102         | 13               | VRERLALGFGSSSF      |
| 31        | 92            | 102         | 10               | RLALGFGSSSF         |
| 32        | 94            | 101         | 7                | ALGFGSSS            |
| 33        | 94            | 102         | 8                | ALGFGSSSF           |
| 34        | 96            | 102         | 6                | GFGSSSF             |
| 35        | 102           | 111         | 8                | FRYAAPAGR           |
| 36        | 103           | 111         | 7                | RYAAPAGR            |
| 37        | 103           | 117         | 13               | RYAAPAGRNWTTADL     |
| 38        | 112           | 119         | 7                | WTTADLAG            |
| 39        | 117           | 129         | 11               | LAGMRIATAYPNL       |
| 40        | 120           | 129         | 8                | MRIATAYPNL          |
| 41        | 121           | 129         | 7                | RIATAYPNL           |
| 42        | 130           | 140         | 10               | VRKDLATKGIE         |
| 43        | 130           | 141         | 11               | VRKDLATKGIEA        |
| 44        | 130           | 142         | 12               | VRKDLATKGIEAT       |
| 45        | 142           | 151         | 9                | TVIRLDGAVE          |
| 46        | 143           | 149         | 6                | VIRLDGA             |
| 47        | 143           | 151         | 8                | VIRLDGAVE           |

| peptide # | Start residue | End residue | Maximum D uptake | Sequence                           |
|-----------|---------------|-------------|------------------|------------------------------------|
| 48        | 152           | 159         | 7                | ISVQLGVA                           |
| 49        | 152           | 160         | 8                | ISVQLGVAD                          |
| 50        | 152           | 161         | 9                | ISVQLGVADA                         |
| 51        | 154           | 161         | 7                | VQLGVADA                           |
| 52        | 157           | 163         | 6                | GVADAIA                            |
| 53        | 157           | 164         | 7                | GVADAIAD                           |
| 54        | 160           | 179         | 19               | DAIADVVGSGRTLSQHDLVA               |
| 55        | 162           | 179         | 17               | IADVVGSGRTLSQHDLVA                 |
| 56        | 164           | 179         | 15               | DVVVGSGRTLSQHDLVA                  |
| 57        | 165           | 179         | 14               | VVGSGRTLSQHDLVA                    |
| 58        | 180           | 186         | 5                | FGEPLCD                            |
| 59        | 180           | 188         | 7                | FGEPLCDSE                          |
| 60        | 190           | 209         | 19               | VLIERAGTDGQDQTEARDQL               |
| 61        | 191           | 199         | 8                | LIERAGTDG                          |
| 62        | 192           | 209         | 17               | IERAGTDGQDQTEARDQL                 |
| 63        | 210           | 218         | 8                | VARVQGVVF                          |
| 64        | 210           | 221         | 11               | VARVQGVVFGQQ                       |
| 65        | 210           | 222         | 12               | VARVQGVVFGQQY                      |
| 66        | 210           | 223         | 13               | VARVQGVVFGQQYL                     |
| 67        | 212           | 218         | 6                | RVQGVVF                            |
| 68        | 212           | 221         | 9                | RVQGVVFGQQ                         |
| 69        | 212           | 223         | 11               | RVQGVVFGQQYL                       |
| 70        | 225           | 233         | 7                | LDYDCPRSA                          |
| 71        | 225           | 234         | 8                | LDYDCPRSAL                         |
| 72        | 226           | 246         | 18               | DYDCPRSALKKATAITPGLES              |
| 73        | 226           | 259         | 28               | DYDCPRSALKKATAITPGLESPTIAPLADPDWVA |
| 74        | 227           | 234         | 6                | YDCPRSAL                           |
| 75        | 235           | 246         | 10               | KKATAITPGLES                       |
| 76        | 235           | 259         | 14               | KKATAITPGLESPTIA                   |
| 77        | 237           | 245         | 7                | ATAITPGLE                          |
| 78        | 242           | 259         | 14               | PGLESPTIAPLADPDWVA                 |
| 79        | 249           | 257         | 6                | IAPLADPDW                          |
| 80        | 258           | 273         | 14               | VAIRALVPRRDVNGIM                   |
| 81        | 260           | 273         | 12               | IRALVPRRDVNGIM                     |
| 82        | 260           | 275         | 14               | IRALVPRRDVNGIMDE                   |
| 83        | 276           | 285         | 9                | LAAIGAKAIL                         |
| 84        | 277           | 285         | 8                | AAIGAKAIL                          |
| 85        | 279           | 285         | 6                | IGAKAIL                            |

**Table S3b. Related to Figure 4. Average relative D uptake at 1 minute, 10 minutes, 30 minutes and 120 minutes of exposure along with standard deviation values (SD) for apo MtATP-PRT at pH 6.8.**

| pH 6.8<br>peptide<br># | D UPTAKE /Da |      |        |      |        |      |         |      |
|------------------------|--------------|------|--------|------|--------|------|---------|------|
|                        | 1 min        | SD   | 10 min | SD   | 30 min | SD   | 120 min | SD   |
| 1                      | 3.04         | 0.04 | 3.04   | 0.05 | 3.38   | 0.08 | 4.08    | 0.09 |
| 2                      | 3.06         | 0.04 | 3.04   | 0.03 | 3.38   | 0.05 | 4.07    | 0.10 |
| 3                      | 2.86         | 0.05 | 2.84   | 0.04 | 3.12   | 0.05 | 3.79    | 0.08 |
| 4                      | 3.05         | 0.03 | 3.02   | 0.05 | 3.30   | 0.06 | 4.01    | 0.10 |
| 5                      | 2.98         | 0.08 | 2.99   | 0.07 | 3.27   | 0.08 | 3.95    | 0.14 |
| 6                      | 0.30         | 0.04 | 0.33   | 0.05 | 0.46   | 0.04 | 0.75    | 0.04 |
| 7                      | 1.77         | 0.09 | 2.17   | 0.16 | 2.43   | 0.09 | 2.96    | 0.09 |
| 8                      | 1.90         | 0.06 | 2.48   | 0.04 | 2.86   | 0.06 | 3.39    | 0.08 |
| 9                      | 1.85         | 0.03 | 2.29   | 0.05 | 2.69   | 0.04 | 3.27    | 0.09 |
| 10                     | 1.73         | 0.12 | 2.08   | 0.05 | 2.25   | 0.09 | 2.43    | 0.24 |
| 11                     | 1.19         | 0.03 | 1.50   | 0.06 | 1.70   | 0.04 | 1.89    | 0.06 |
| 12                     | 1.10         | 0.08 | 1.42   | 0.05 | 1.54   | 0.05 | 1.69    | 0.08 |
| 13                     | 0.91         | 0.02 | 1.04   | 0.02 | 1.21   | 0.02 | 1.39    | 0.02 |
| 14                     | 1.18         | 0.11 | 1.62   | 0.05 | 1.86   | 0.03 | 2.12    | 0.03 |
| 15                     | 1.06         | 0.10 | 1.62   | 0.11 | 1.94   | 0.09 | 2.21    | 0.11 |
| 16                     | 1.16         | 0.10 | 1.51   | 0.06 | 1.87   | 0.07 | 2.37    | 0.06 |
| 17                     | 0.61         | 0.03 | 0.93   | 0.03 | 1.18   | 0.07 | 1.73    | 0.04 |
| 18                     | 0.48         | 0.06 | 0.69   | 0.05 | 1.02   | 0.07 | 1.57    | 0.13 |
| 19                     | 0.62         | 0.04 | 0.91   | 0.03 | 1.27   | 0.03 | 1.74    | 0.04 |
| 20                     | 0.53         | 0.01 | 0.84   | 0.02 | 1.20   | 0.03 | 1.65    | 0.07 |
| 21                     | 0.68         | 0.03 | 1.05   | 0.02 | 1.45   | 0.03 | 2.02    | 0.06 |
| 22                     | 0.94         | 0.12 | 1.69   | 0.12 | 2.12   | 0.02 | 2.54    | 0.15 |
| 23                     | 1.13         | 0.09 | 1.63   | 0.10 | 2.05   | 0.03 | 2.34    | 0.04 |
| 24                     | 0.92         | 0.07 | 1.16   | 0.06 | 1.23   | 0.06 | 1.32    | 0.15 |
| 25                     | 0.72         | 0.02 | 0.92   | 0.01 | 1.00   | 0.01 | 1.06    | 0.01 |
| 26                     | 0.74         | 0.11 | 0.86   | 0.07 | 1.04   | 0.10 | 1.03    | 0.06 |
| 27                     | 1.96         | 0.03 | 1.96   | 0.03 | 2.05   | 0.07 | 2.23    | 0.04 |
| 28                     | 3.00         | 0.04 | 3.54   | 0.12 | 3.72   | 0.15 | 3.72    | 0.08 |
| 29                     | 2.51         | 0.14 | 2.70   | 0.16 | 2.83   | 0.12 | 2.91    | 0.18 |
| 30                     | 2.28         | 0.20 | 2.54   | 0.13 | 3.02   | 0.28 | 3.40    | 0.19 |
| 31                     | 1.86         | 0.03 | 2.16   | 0.01 | 2.50   | 0.06 | 3.05    | 0.03 |
| 32                     | 1.97         | 0.03 | 2.04   | 0.07 | 2.17   | 0.02 | 2.57    | 0.04 |
| 33                     | 1.24         | 0.03 | 1.49   | 0.04 | 1.86   | 0.06 | 2.39    | 0.07 |
| 34                     | 1.60         | 0.01 | 1.74   | 0.01 | 1.86   | 0.02 | 2.00    | 0.02 |
| 35                     | 2.25         | 0.06 | 2.41   | 0.06 | 2.56   | 0.05 | 3.05    | 0.13 |
| 36                     | 2.31         | 0.04 | 2.46   | 0.01 | 2.56   | 0.03 | 2.87    | 0.02 |
| 37                     | 3.69         | 0.04 | 4.02   | 0.02 | 4.42   | 0.05 | 5.17    | 0.08 |
| 38                     | 1.17         | 0.05 | 1.30   | 0.02 | 1.62   | 0.07 | 2.15    | 0.04 |
| 39                     | 0.55         | 0.08 | 0.88   | 0.06 | 1.70   | 0.12 | 3.17    | 0.08 |
| 40                     | 0.39         | 0.16 | 0.65   | 0.16 | 1.13   | 0.18 | 2.19    | 0.18 |
| 41                     | 0.39         | 0.24 | 0.59   | 0.20 | 0.98   | 0.21 | 1.92    | 0.20 |
| 42                     | 1.35         | 0.04 | 2.08   | 0.04 | 2.37   | 0.03 | 2.88    | 0.05 |
| 43                     | 1.95         | 0.06 | 2.79   | 0.05 | 3.04   | 0.05 | 3.55    | 0.04 |
| 44                     | 2.08         | 0.15 | 3.15   | 0.19 | 3.54   | 0.14 | 4.33    | 0.10 |
| 45                     | 2.17         | 0.09 | 2.86   | 0.08 | 3.47   | 0.06 | 4.27    | 0.13 |

| peptide # | 1 min | SD   | 10 min | SD   | 30 min | SD   | 120 min | SD   |
|-----------|-------|------|--------|------|--------|------|---------|------|
| 46        | 1.33  | 0.05 | 1.56   | 0.06 | 1.80   | 0.08 | 2.17    | 0.07 |
| 47        | 2.01  | 0.04 | 2.63   | 0.06 | 3.12   | 0.04 | 3.75    | 0.02 |
| 48        | 1.37  | 0.03 | 1.75   | 0.03 | 2.07   | 0.01 | 2.91    | 0.03 |
| 49        | 1.45  | 0.11 | 1.83   | 0.07 | 2.19   | 0.06 | 2.97    | 0.08 |
| 50        | 1.70  | 0.17 | 2.16   | 0.36 | 2.43   | 0.04 | 3.29    | 0.10 |
| 51        | 0.70  | 0.03 | 1.00   | 0.03 | 1.27   | 0.05 | 1.86    | 0.05 |
| 52        | 0.40  | 0.06 | 0.38   | 0.04 | 0.61   | 0.07 | 1.29    | 0.07 |
| 53        | 0.45  | 0.08 | 0.44   | 0.02 | 0.68   | 0.08 | 1.48    | 0.12 |
| 54        | 6.01  | 0.07 | 6.14   | 0.07 | 6.72   | 0.12 | 7.97    | 0.11 |
| 55        | 4.44  | 0.11 | 4.84   | 0.09 | 5.23   | 0.10 | 6.00    | 0.07 |
| 57        | 2.83  | 0.04 | 3.28   | 0.12 | 3.40   | 0.07 | 3.64    | 0.03 |
| 58        | 0.71  | 0.03 | 0.70   | 0.05 | 0.82   | 0.09 | 1.28    | 0.04 |
| 59        | 0.56  | 0.04 | 0.66   | 0.04 | 0.96   | 0.05 | 1.46    | 0.07 |
| 60        | 6.35  | 0.18 | 6.93   | 0.10 | 7.17   | 0.16 | 7.62    | 0.15 |
| 61        | 1.16  | 0.09 | 1.48   | 0.12 | 1.87   | 0.15 | 2.40    | 0.08 |
| 62        | 5.97  | 0.06 | 6.40   | 0.04 | 6.60   | 0.13 | 7.01    | 0.12 |
| 63        | 0.24  | 0.02 | 0.32   | 0.02 | 0.86   | 0.02 | 2.02    | 0.02 |
| 64        | 0.58  | 0.05 | 0.95   | 0.07 | 2.31   | 0.06 | 3.89    | 0.06 |
| 65        | 0.63  | 0.11 | 1.19   | 0.08 | 2.72   | 0.03 | 4.56    | 0.07 |
| 66        | 0.61  | 0.04 | 1.21   | 0.05 | 2.93   | 0.03 | 4.82    | 0.15 |
| 67        | 0.15  | 0.03 | 0.22   | 0.02 | 0.69   | 0.04 | 1.66    | 0.03 |
| 68        | 0.57  | 0.06 | 0.99   | 0.07 | 1.94   | 0.07 | 3.52    | 0.14 |
| 69        | 0.49  | 0.07 | 1.03   | 0.07 | 2.83   | 0.16 | 4.75    | 0.08 |
| 70        | 0.72  | 0.05 | 1.08   | 0.10 | 2.02   | 0.07 | 2.63    | 0.08 |
| 71        | 0.82  | 0.03 | 1.26   | 0.04 | 2.44   | 0.03 | 3.22    | 0.03 |
| 72        | 4.31  | 0.31 | 5.62   | 0.18 | 7.56   | 0.30 | 8.65    | 0.27 |
| 73        | 6.10  | 0.18 | 9.13   | 0.17 | 11.32  | 0.26 | 13.03   | 0.31 |
| 74        | 0.80  | 0.09 | 1.17   | 0.10 | 2.05   | 0.09 | 2.57    | 0.09 |
| 75        | 2.55  | 0.04 | 3.07   | 0.17 | 4.11   | 0.02 | 4.83    | 0.17 |
| 77        | 1.48  | 0.06 | 1.75   | 0.02 | 2.35   | 0.02 | 2.91    | 0.05 |
| 78        | 3.45  | 0.09 | 4.65   | 0.06 | 5.29   | 0.17 | 6.06    | 0.15 |
| 79        | 1.20  | 0.03 | 1.82   | 0.14 | 2.07   | 0.14 | 2.38    | 0.07 |
| 80        | 1.49  | 0.08 | 1.81   | 0.09 | 3.28   | 0.07 | 5.24    | 0.16 |
| 81        | 1.53  | 0.03 | 1.77   | 0.04 | 2.84   | 0.03 | 4.24    | 0.07 |
| 82        | 1.68  | 0.13 | 2.00   | 0.17 | 3.29   | 0.18 | 4.65    | 0.18 |
| 83        | 0.53  | 0.02 | 1.50   | 0.03 | 2.86   | 0.02 | 4.32    | 0.03 |
| 84        | 0.50  | 0.02 | 1.38   | 0.03 | 2.61   | 0.03 | 3.92    | 0.04 |
| 85        | 0.42  | 0.04 | 1.08   | 0.06 | 2.23   | 0.10 | 3.26    | 0.16 |

**Table S3c. Related to Figure 4. Average relative D uptake at 1 minute, 10 minutes, 30 minutes and 120 minutes of exposure along with standard deviation values (SD) for MtATP-PRT in presence of L-histidine at pH 6.8.**

| pH 6.8<br>peptide<br># | D UPTAKE /Da |      |        |      |        |      |         |      |
|------------------------|--------------|------|--------|------|--------|------|---------|------|
|                        | 1 min        | SD   | 10 min | SD   | 30 min | SD   | 120 min | SD   |
| 1                      | 3.05         | 0.03 | 3.00   | 0.03 | 3.25   | 0.03 | 3.67    | 0.06 |
| 2                      | 3.03         | 0.04 | 2.97   | 0.04 | 3.22   | 0.02 | 3.60    | 0.05 |
| 3                      | 2.84         | 0.03 | 2.77   | 0.02 | 2.94   | 0.03 | 3.25    | 0.06 |
| 4                      | 3.03         | 0.04 | 2.97   | 0.03 | 3.26   | 0.03 | 3.60    | 0.06 |
| 5                      | 2.95         | 0.08 | 2.89   | 0.09 | 3.09   | 0.08 | 3.43    | 0.10 |
| 6                      | 0.36         | 0.06 | 0.31   | 0.06 | 0.41   | 0.03 | 0.65    | 0.04 |
| 7                      | 1.80         | 0.05 | 2.07   | 0.13 | 2.17   | 0.04 | 2.38    | 0.04 |
| 8                      | 1.95         | 0.05 | 2.43   | 0.04 | 2.61   | 0.04 | 2.78    | 0.04 |
| 9                      | 1.89         | 0.11 | 2.23   | 0.05 | 2.41   | 0.10 | 2.62    | 0.06 |
| 10                     | 1.76         | 0.08 | 2.02   | 0.17 | 2.20   | 0.05 | 2.13    | 0.12 |
| 11                     | 1.21         | 0.02 | 1.53   | 0.04 | 1.66   | 0.05 | 1.67    | 0.02 |
| 12                     | 1.10         | 0.06 | 1.39   | 0.06 | 1.48   | 0.08 | 1.51    | 0.06 |
| 13                     | 0.87         | 0.02 | 1.03   | 0.02 | 1.23   | 0.02 | 1.32    | 0.03 |
| 14                     | 1.12         | 0.05 | 1.58   | 0.05 | 1.89   | 0.05 | 2.03    | 0.05 |
| 15                     | 1.06         | 0.08 | 1.66   | 0.14 | 1.96   | 0.06 | 2.12    | 0.09 |
| 16                     | 1.04         | 0.03 | 1.37   | 0.02 | 1.64   | 0.04 | 1.87    | 0.05 |
| 17                     | 0.56         | 0.04 | 0.83   | 0.06 | 1.13   | 0.03 | 1.47    | 0.02 |
| 18                     | 0.42         | 0.07 | 0.67   | 0.09 | 0.93   | 0.07 | 1.29    | 0.06 |
| 19                     | 0.61         | 0.03 | 0.86   | 0.03 | 1.23   | 0.03 | 1.62    | 0.03 |
| 20                     | 0.53         | 0.02 | 0.80   | 0.03 | 1.13   | 0.01 | 1.54    | 0.03 |
| 21                     | 0.65         | 0.03 | 1.00   | 0.02 | 1.42   | 0.02 | 1.93    | 0.04 |
| 22                     | 1.05         | 0.05 | 1.63   | 0.04 | 2.18   | 0.11 | 2.67    | 0.05 |
| 23                     | 1.10         | 0.11 | 1.61   | 0.10 | 2.06   | 0.09 | 2.42    | 0.05 |
| 24                     | 0.90         | 0.05 | 1.11   | 0.06 | 1.21   | 0.06 | 1.21    | 0.07 |
| 25                     | 0.69         | 0.02 | 0.89   | 0.01 | 0.98   | 0.01 | 0.98    | 0.02 |
| 26                     | 0.76         | 0.11 | 1.02   | 0.11 | 1.03   | 0.11 | 1.05    | 0.12 |
| 27                     | 1.96         | 0.02 | 1.93   | 0.03 | 2.01   | 0.04 | 2.07    | 0.04 |
| 28                     | 3.33         | 0.16 | 3.40   | 0.05 | 3.64   | 0.01 | 3.66    | 0.08 |
| 29                     | 2.56         | 0.18 | 2.80   | 0.10 | 2.94   | 0.08 | 2.96    | 0.15 |
| 30                     | 2.35         | 0.07 | 2.45   | 0.15 | 2.68   | 0.13 | 3.28    | 0.14 |
| 31                     | 1.89         | 0.05 | 2.04   | 0.02 | 2.35   | 0.05 | 2.83    | 0.06 |
| 32                     | 2.14         | 0.14 | 2.38   | 0.06 | 2.17   | 0.07 | 2.47    | 0.03 |
| 33                     | 1.20         | 0.04 | 1.37   | 0.03 | 1.68   | 0.04 | 2.21    | 0.06 |
| 34                     | 1.59         | 0.04 | 1.64   | 0.03 | 1.80   | 0.02 | 1.93    | 0.06 |
| 35                     | 2.21         | 0.06 | 2.40   | 0.07 | 2.40   | 0.03 | 2.37    | 0.05 |
| 36                     | 2.31         | 0.04 | 2.40   | 0.03 | 2.43   | 0.04 | 2.41    | 0.04 |
| 37                     | 3.64         | 0.04 | 3.89   | 0.02 | 4.14   | 0.02 | 4.46    | 0.08 |
| 38                     | 1.18         | 0.05 | 1.21   | 0.04 | 1.49   | 0.03 | 1.81    | 0.04 |
| 39                     | 0.45         | 0.04 | 0.69   | 0.05 | 0.99   | 0.04 | 1.28    | 0.04 |
| 40                     | 0.32         | 0.17 | 0.41   | 0.17 | 0.61   | 0.17 | 0.85    | 0.17 |
| 41                     | 0.31         | 0.28 | 0.48   | 0.27 | 0.64   | 0.27 | 0.88    | 0.28 |
| 42                     | 1.30         | 0.03 | 2.03   | 0.03 | 2.20   | 0.03 | 2.23    | 0.04 |
| 43                     | 1.90         | 0.04 | 2.76   | 0.04 | 2.89   | 0.05 | 2.93    | 0.05 |
| 44                     | 2.02         | 0.10 | 3.10   | 0.15 | 3.32   | 0.18 | 3.51    | 0.22 |
| 45                     | 2.13         | 0.08 | 2.80   | 0.07 | 3.23   | 0.06 | 3.73    | 0.07 |

| peptide # | 1 min | SD   | 10 min | SD   | 30 min | SD   | 120 min | SD   |
|-----------|-------|------|--------|------|--------|------|---------|------|
| 46        | 1.30  | 0.03 | 1.52   | 0.06 | 1.71   | 0.09 | 1.83    | 0.07 |
| 47        | 1.96  | 0.02 | 2.53   | 0.02 | 2.94   | 0.03 | 3.36    | 0.03 |
| 48        | 1.33  | 0.01 | 1.69   | 0.01 | 1.75   | 0.02 | 1.86    | 0.03 |
| 49        | 1.46  | 0.05 | 1.84   | 0.06 | 1.90   | 0.03 | 2.09    | 0.06 |
| 50        | 1.68  | 0.31 | 1.99   | 0.03 | 2.11   | 0.04 | 2.27    | 0.06 |
| 51        | 0.65  | 0.03 | 0.91   | 0.01 | 0.98   | 0.01 | 1.02    | 0.01 |
| 52        | 0.35  | 0.03 | 0.29   | 0.03 | 0.31   | 0.03 | 0.33    | 0.04 |
| 53        | 0.45  | 0.02 | 0.36   | 0.02 | 0.42   | 0.07 | 0.48    | 0.05 |
| 54        | 5.88  | 0.09 | 6.05   | 0.04 | 6.40   | 0.05 | 6.96    | 0.12 |
| 55        | 4.39  | 0.11 | 4.78   | 0.08 | 5.15   | 0.07 | 5.58    | 0.10 |
| 57        | 2.84  | 0.03 | 3.23   | 0.03 | 3.38   | 0.03 | 3.34    | 0.05 |
| 58        | 0.57  | 0.05 | 0.57   | 0.04 | 0.64   | 0.04 | 0.84    | 0.05 |
| 59        | 0.52  | 0.02 | 0.55   | 0.03 | 0.71   | 0.04 | 1.09    | 0.04 |
| 60        | 6.58  | 0.16 | 7.01   | 0.16 | 7.22   | 0.11 | 7.52    | 0.13 |
| 61        | 1.21  | 0.06 | 1.32   | 0.10 | 1.67   | 0.11 | 2.17    | 0.07 |
| 62        | 5.99  | 0.03 | 6.42   | 0.03 | 6.69   | 0.03 | 6.98    | 0.10 |
| 63        | 0.22  | 0.01 | 0.21   | 0.01 | 0.24   | 0.01 | 0.31    | 0.01 |
| 64        | 0.49  | 0.03 | 0.60   | 0.03 | 0.87   | 0.02 | 1.24    | 0.03 |
| 65        | 0.49  | 0.04 | 0.62   | 0.05 | 0.96   | 0.02 | 1.37    | 0.04 |
| 66        | 0.45  | 0.05 | 0.67   | 0.04 | 0.90   | 0.10 | 1.26    | 0.09 |
| 67        | 0.13  | 0.03 | 0.11   | 0.03 | 0.11   | 0.02 | 0.18    | 0.02 |
| 68        | 0.51  | 0.08 | 0.63   | 0.07 | 0.82   | 0.07 | 1.22    | 0.06 |
| 69        | 0.52  | 0.11 | 0.65   | 0.07 | 0.82   | 0.11 | 1.16    | 0.07 |
| 70        | 0.66  | 0.05 | 0.90   | 0.03 | 1.30   | 0.03 | 1.92    | 0.06 |
| 71        | 0.76  | 0.03 | 1.00   | 0.03 | 1.43   | 0.03 | 2.08    | 0.05 |
| 72        | 3.16  | 0.13 | 4.43   | 0.34 | 5.37   | 0.10 | 7.08    | 0.17 |
| 73        | 3.87  | 0.18 | 5.65   | 0.17 | 7.26   | 0.21 | 10.01   | 0.20 |
| 74        | 0.81  | 0.08 | 1.02   | 0.07 | 1.41   | 0.07 | 2.02    | 0.09 |
| 75        | 1.50  | 0.07 | 2.30   | 0.07 | 2.78   | 0.06 | 3.26    | 0.26 |
| 77        | 1.43  | 0.06 | 1.76   | 0.02 | 2.12   | 0.06 | 2.55    | 0.08 |
| 78        | 1.77  | 0.04 | 2.74   | 0.08 | 3.44   | 0.13 | 4.28    | 0.11 |
| 79        | 1.24  | 0.05 | 1.83   | 0.05 | 2.03   | 0.06 | 2.24    | 0.06 |
| 80        | 1.54  | 0.14 | 1.60   | 0.15 | 2.04   | 0.10 | 2.72    | 0.15 |
| 81        | 1.54  | 0.02 | 1.69   | 0.03 | 2.07   | 0.03 | 2.77    | 0.05 |
| 82        | 1.75  | 0.13 | 2.03   | 0.12 | 2.55   | 0.13 | 3.30    | 0.14 |
| 83        | 0.80  | 0.01 | 1.61   | 0.01 | 1.99   | 0.03 | 2.29    | 0.03 |
| 84        | 0.76  | 0.01 | 1.45   | 0.01 | 1.72   | 0.01 | 1.80    | 0.03 |
| 85        | 0.61  | 0.04 | 1.20   | 0.05 | 1.42   | 0.07 | 1.50    | 0.06 |

**Table S3d. Related to Figure 4. Average relative D uptake at 1 minute, 10 minutes, 30 minutes and 120 minutes of exposure along with standard deviation values (SD) for apo MtATP-PRT at pH 9.**

| pH 9<br>peptide<br># | D UPTAKE /Da |      |        |      |        |      |         |      |
|----------------------|--------------|------|--------|------|--------|------|---------|------|
|                      | 1 min        | SD   | 10 min | SD   | 30 min | SD   | 120 min | SD   |
| 1                    | 4.13         | 0.13 | 4.31   | 0.13 | 4.88   | 0.13 | 5.56    | 0.39 |
| 2                    | 4.30         | 0.04 | 4.40   | 0.09 | 5.03   | 0.11 | 5.74    | 0.13 |
| 3                    | 4.40         | 0.02 | 4.60   | 0.05 | 5.24   | 0.06 | 6.05    | 0.14 |
| 4                    | 4.01         | 0.15 | 4.25   | 0.12 | 4.81   | 0.18 | 5.44    | 0.22 |
| 5                    | 4.71         | 2.24 | 4.82   | 1.85 | 5.39   | 1.55 | 6.08    | 1.05 |
| 6                    | 0.82         | 0.13 | 0.96   | 0.05 | 1.09   | 0.17 | 1.59    | 0.09 |
| 7                    | 2.21         | 0.15 | 2.42   | 0.08 | 2.83   | 0.19 | 2.97    | 0.16 |
| 8                    | 2.43         | 0.11 | 2.75   | 0.12 | 3.19   | 0.11 | 3.47    | 0.12 |
| 9                    | 3.79         | 0.27 | 4.01   | 0.25 | 4.27   | 0.23 | 4.53    | 0.22 |
| 10                   | 2.24         | 1.09 | 2.45   | 0.81 | 2.82   | 1.35 | 3.01    | 1.51 |
| 11                   | 1.55         | 0.04 | 1.85   | 0.05 | 2.06   | 0.06 | 2.34    | 0.06 |
| 12                   | 1.44         | 0.08 | 1.72   | 0.06 | 1.86   | 0.08 | 2.12    | 0.09 |
| 13                   | 1.06         | 0.02 | 1.24   | 0.02 | 1.39   | 0.02 | 1.54    | 0.03 |
| 14                   | 1.49         | 0.03 | 1.89   | 0.03 | 2.14   | 0.03 | 2.41    | 0.04 |
| 15                   | 1.51         | 0.08 | 1.99   | 0.08 | 2.27   | 0.07 | 2.56    | 0.08 |
| 16                   | 1.60         | 0.26 | 1.98   | 0.44 | 2.37   | 0.38 | 2.68    | 0.23 |
| 17                   | 0.89         | 0.17 | 1.26   | 0.15 | 1.59   | 0.25 | 2.13    | 0.45 |
| 18                   | 0.91         | 0.12 | 1.31   | 0.08 | 1.68   | 0.15 | 2.38    | 0.15 |
| 19                   | 1.12         | 0.04 | 1.49   | 0.04 | 1.94   | 0.04 | 2.36    | 0.06 |
| 20                   | 0.89         | 0.02 | 1.25   | 0.03 | 1.61   | 0.01 | 2.03    | 0.02 |
| 21                   | 1.20         | 0.03 | 1.64   | 0.02 | 2.12   | 0.04 | 2.53    | 0.02 |
| 22                   | 1.69         | 0.24 | 2.67   | 0.17 | 3.42   | 0.23 | 3.82    | 0.24 |
| 23                   | 1.75         | 0.27 | 2.35   | 0.24 | 2.87   | 0.21 | 3.33    | 0.30 |
| 24                   | 1.38         | 0.03 | 1.49   | 0.14 | 1.66   | 0.16 | 1.92    | 0.17 |
| 25                   | 0.97         | 0.03 | 1.13   | 0.03 | 1.23   | 0.06 | 1.42    | 0.08 |
| 26                   | 1.05         | 0.03 | 1.20   | 0.12 | 1.31   | 0.07 | 1.54    | 0.11 |
| 27                   | 2.20         | 0.04 | 2.10   | 0.06 | 2.17   | 0.09 | 2.27    | 0.16 |
| 28                   | 3.68         | 0.22 | 3.80   | 0.12 | 3.96   | 0.13 | 4.07    | 0.34 |
| 29                   | 2.90         | 0.19 | 3.18   | 0.22 | 3.40   | 0.22 | 3.46    | 0.27 |
| 30                   | 2.62         | 0.18 | 2.92   | 0.08 | 3.37   | 0.12 | 3.99    | 0.27 |
| 31                   | 2.26         | 0.05 | 2.60   | 0.60 | 3.16   | 0.76 | 3.55    | 0.67 |
| 32                   | 2.30         | 0.09 | 2.24   | 0.02 | 2.36   | 0.03 | 2.65    | 0.07 |
| 33                   | 1.53         | 0.04 | 1.74   | 0.04 | 2.04   | 0.05 | 2.48    | 0.07 |
| 34                   | 1.64         | 0.02 | 1.68   | 0.03 | 1.77   | 0.07 | 1.88    | 0.04 |
| 35                   | 2.80         | 0.07 | 2.86   | 0.06 | 3.11   | 0.10 | 3.54    | 0.11 |
| 36                   | 2.76         | 0.06 | 2.80   | 0.07 | 2.94   | 0.07 | 3.16    | 0.09 |
| 37                   | 4.80         | 0.25 | 4.86   | 1.18 | 5.48   | 1.48 | 6.04    | 1.69 |
| 38                   | 1.70         | 0.44 | 1.97   | 0.75 | 2.20   | 0.58 | 2.59    | 0.63 |
| 39                   | 1.72         | 0.23 | 2.32   | 0.26 | 3.08   | 0.27 | 4.05    | 0.21 |
| 40                   | 1.24         | 0.40 | 1.81   | 0.45 | 2.28   | 0.41 | 3.30    | 0.42 |
| 41                   | 1.36         | 0.58 | 1.60   | 0.26 | 2.16   | 0.72 | 3.19    | 0.36 |
| 42                   | 2.18         | 0.04 | 2.59   | 0.05 | 2.91   | 0.03 | 3.34    | 0.07 |
| 43                   | 2.81         | 0.05 | 3.19   | 0.03 | 3.46   | 0.02 | 3.93    | 0.06 |
| 44                   | 3.23         | 0.15 | 3.73   | 0.14 | 4.17   | 0.16 | 4.86    | 0.12 |
| 45                   | 2.69         | 0.10 | 3.18   | 0.06 | 3.78   | 0.07 | 4.32    | 0.14 |



| peptide # | 1 min | SD   | 10 min | SD   | 30 min | SD   | 120 min | SD   |
|-----------|-------|------|--------|------|--------|------|---------|------|
| 46        | 1.60  | 0.09 | 1.72   | 0.06 | 1.89   | 0.06 | 2.17    | 0.07 |
| 47        | 2.45  | 0.03 | 2.82   | 0.02 | 3.32   | 0.02 | 3.70    | 0.06 |
| 48        | 1.90  | 0.18 | 2.26   | 0.13 | 2.68   | 0.13 | 3.47    | 0.16 |
| 49        | 2.00  | 0.51 | 2.55   | 0.50 | 3.01   | 0.46 | 3.69    | 0.49 |
| 50        | 2.31  | 0.14 | 2.65   | 0.13 | 3.17   | 0.22 | 3.95    | 0.15 |
| 51        | 1.12  | 0.06 | 1.38   | 0.03 | 1.78   | 0.11 | 2.31    | 0.05 |
| 52        | 0.62  | 0.11 | 0.83   | 0.06 | 1.61   | 0.36 | 1.71    | 0.08 |
| 53        | 1.10  | 0.13 | 1.09   | 0.10 | 1.52   | 0.08 | 2.11    | 0.10 |
| 54        | 6.82  | 0.07 | 7.00   | 0.11 | 7.72   | 0.10 | 8.69    | 0.19 |
| 55        | 5.00  | 0.03 | 5.21   | 0.07 | 5.67   | 0.07 | 6.22    | 0.15 |
| 56        | 5.05  | 0.03 | 5.22   | 0.05 | 5.47   | 0.07 | 5.83    | 0.14 |
| 57        | 3.27  | 0.03 | 3.48   | 0.04 | 3.62   | 0.04 | 3.82    | 0.10 |
| 58        | 0.67  | 0.04 | 0.77   | 0.05 | 0.94   | 0.04 | 1.23    | 0.06 |
| 59        | 0.73  | 0.10 | 0.91   | 0.06 | 1.19   | 0.06 | 1.66    | 0.09 |
| 60        | 7.13  | 0.13 | 7.29   | 0.08 | 7.51   | 0.13 | 7.98    | 0.16 |
| 61        | 1.33  | 0.07 | 1.66   | 0.11 | 1.94   | 0.13 | 2.32    | 0.06 |
| 62        | 6.65  | 0.05 | 6.70   | 0.07 | 6.84   | 0.10 | 7.15    | 0.15 |
| 63        | 0.97  | 0.05 | 1.31   | 0.05 | 2.10   | 0.08 | 3.02    | 0.17 |
| 64        | 1.84  | 0.07 | 2.56   | 0.08 | 3.85   | 0.07 | 4.84    | 0.10 |
| 65        | 2.09  | 0.59 | 2.85   | 0.50 | 4.56   | 0.31 | 5.62    | 0.34 |
| 66        | 2.19  | 0.47 | 3.07   | 0.52 | 4.68   | 0.27 | 5.81    | 0.26 |
| 67        | 1.13  | 0.19 | 1.34   | 0.21 | 1.67   | 0.19 | 2.28    | 0.07 |
| 68        | 1.40  | 0.11 | 1.99   | 0.19 | 3.24   | 0.08 | 4.19    | 0.06 |
| 69        | 1.87  | 0.39 | 2.63   | 0.48 | 4.22   | 0.33 | 5.55    | 0.32 |
| 70        | 1.09  | 0.03 | 1.61   | 0.04 | 2.41   | 0.04 | 2.64    | 0.07 |
| 71        | 1.57  | 0.73 | 2.39   | 0.71 | 3.25   | 0.60 | 3.86    | 0.81 |
| 72        | 5.51  | 0.14 | 6.81   | 0.11 | 8.42   | 0.27 | 8.53    | 0.37 |
| 73        | 8.21  | 0.23 | 10.36  | 0.22 | 12.37  | 0.18 | 13.18   | 0.38 |
| 74        | 1.01  | 0.11 | 1.49   | 0.12 | 2.21   | 0.11 | 2.48    | 0.13 |
| 75        | 3.72  | 0.46 | 4.17   | 0.48 | 4.68   | 0.60 | 4.82    | 0.70 |
| 76        | 5.58  | 0.05 | 6.71   | 0.04 | 7.77   | 0.09 | 8.31    | 0.17 |
| 77        | 1.77  | 0.11 | 2.12   | 0.08 | 2.53   | 0.13 | 2.86    | 0.11 |
| 78        | 4.32  | 0.16 | 4.95   | 0.20 | 5.22   | 0.26 | 5.52    | 0.08 |
| 79        | 1.81  | 0.63 | 2.19   | 0.59 | 2.23   | 0.47 | 2.48    | 0.56 |
| 80        | 1.74  | 0.08 | 2.41   | 0.20 | 4.29   | 0.14 | 5.67    | 0.20 |
| 81        | 1.76  | 0.04 | 2.18   | 0.06 | 3.60   | 0.11 | 4.57    | 0.12 |
| 82        | 1.94  | 0.13 | 2.53   | 0.18 | 4.03   | 0.19 | 5.10    | 0.32 |
| 83        | 1.11  | 0.06 | 2.13   | 0.08 | 3.75   | 0.09 | 4.67    | 0.11 |
| 84        | 1.02  | 0.05 | 1.94   | 0.07 | 3.31   | 0.12 | 4.29    | 0.09 |
| 85        | 0.88  | 0.06 | 1.65   | 0.10 | 2.85   | 0.14 | 3.65    | 0.12 |

**Table S3e. Related to Figure 4. Average relative D uptake at 1 minute, 10 minutes, 30 minutes and 120 minutes of exposure along with standard deviation values (SD) for MtATP-PRT in presence of L-histidine at pH 9.**

| pH 9<br>peptide<br># | D UPTAKE / Da |      |        |      |        |      |         |      |
|----------------------|---------------|------|--------|------|--------|------|---------|------|
|                      | 1 min         | SD   | 10 min | SD   | 30 min | SD   | 120 min | SD   |
| 1                    | 4.09          | 0.03 | 4.26   | 0.04 | 4.71   | 0.05 | 5.42    | 0.28 |
| 2                    | 4.23          | 0.02 | 4.33   | 0.06 | 4.82   | 0.18 | 5.57    | 0.05 |
| 3                    | 4.33          | 0.04 | 4.50   | 0.06 | 4.98   | 0.07 | 5.87    | 0.07 |
| 4                    | 4.00          | 0.13 | 4.18   | 0.08 | 4.60   | 0.20 | 5.28    | 0.20 |
| 5                    | 4.75          | 2.40 | 4.75   | 1.90 | 5.00   | 0.75 | 5.95    | 1.58 |
| 6                    | 0.80          | 0.06 | 0.80   | 0.14 | 1.13   | 0.05 | 1.36    | 0.07 |
| 7                    | 2.23          | 0.14 | 2.49   | 0.16 | 2.64   | 0.14 | 3.06    | 0.09 |
| 8                    | 2.33          | 0.05 | 2.58   | 0.13 | 3.20   | 0.16 | 3.39    | 0.09 |
| 9                    | 3.67          | 0.24 | 3.98   | 0.25 | 4.24   | 0.24 | 4.45    | 0.18 |
| 10                   | 2.45          | 1.11 | 2.48   | 0.84 | 2.78   | 1.32 | 2.96    | 1.06 |
| 11                   | 1.55          | 0.04 | 1.85   | 0.04 | 1.99   | 0.06 | 2.25    | 0.05 |
| 12                   | 1.41          | 0.06 | 1.67   | 0.07 | 1.82   | 0.07 | 2.05    | 0.07 |
| 13                   | 1.04          | 0.01 | 1.22   | 0.02 | 1.37   | 0.02 | 1.54    | 0.02 |
| 14                   | 1.46          | 0.02 | 1.89   | 0.04 | 2.12   | 0.02 | 2.37    | 0.02 |
| 15                   | 1.47          | 0.04 | 1.91   | 0.11 | 2.18   | 0.07 | 2.50    | 0.04 |
| 16                   | 1.49          | 0.23 | 1.85   | 0.10 | 2.23   | 0.18 | 2.57    | 0.13 |
| 17                   | 0.90          | 0.10 | 1.24   | 0.13 | 1.62   | 0.14 | 2.14    | 0.24 |
| 18                   | 0.90          | 0.08 | 1.24   | 0.07 | 1.60   | 0.07 | 2.37    | 0.23 |
| 19                   | 1.09          | 0.02 | 1.45   | 0.03 | 1.90   | 0.03 | 2.35    | 0.02 |
| 20                   | 0.85          | 0.02 | 1.22   | 0.03 | 1.58   | 0.03 | 1.95    | 0.02 |
| 21                   | 1.17          | 0.03 | 1.61   | 0.02 | 2.08   | 0.03 | 2.54    | 0.02 |
| 22                   | 2.08          | 0.24 | 2.80   | 0.12 | 3.50   | 0.16 | 4.04    | 0.12 |
| 23                   | 1.75          | 0.27 | 2.42   | 0.24 | 3.03   | 0.26 | 3.50    | 0.18 |
| 24                   | 1.29          | 0.07 | 1.55   | 0.09 | 1.62   | 0.15 | 1.85    | 0.13 |
| 25                   | 0.94          | 0.03 | 1.13   | 0.04 | 1.23   | 0.07 | 1.31    | 0.05 |
| 26                   | 0.94          | 0.06 | 1.12   | 0.05 | 1.23   | 0.08 | 1.41    | 0.10 |
| 27                   | 2.17          | 0.02 | 2.09   | 0.02 | 2.15   | 0.03 | 2.31    | 0.06 |
| 28                   | 3.70          | 0.11 | 3.82   | 0.13 | 3.93   | 0.15 | 4.02    | 0.27 |
| 29                   | 3.01          | 0.27 | 3.09   | 0.29 | 3.27   | 0.23 | 3.55    | 0.14 |
| 30                   | 2.73          | 0.10 | 2.96   | 0.16 | 3.28   | 0.11 | 4.12    | 0.10 |
| 31                   | 2.38          | 0.60 | 2.46   | 0.04 | 2.77   | 0.04 | 3.41    | 0.53 |
| 32                   | 2.34          | 0.15 | 2.31   | 0.10 | 2.38   | 0.02 | 2.72    | 0.05 |
| 33                   | 1.49          | 0.03 | 1.70   | 0.03 | 1.96   | 0.04 | 2.42    | 0.06 |
| 34                   | 1.60          | 0.02 | 1.66   | 0.02 | 1.73   | 0.03 | 1.86    | 0.01 |
| 35                   | 2.76          | 0.11 | 2.84   | 0.06 | 2.93   | 0.11 | 3.47    | 0.10 |
| 36                   | 2.74          | 0.05 | 2.83   | 0.08 | 2.90   | 0.09 | 3.18    | 0.08 |
| 37                   | 4.86          | 1.31 | 4.55   | 0.12 | 5.30   | 1.86 | 5.85    | 0.79 |
| 38                   | 1.57          | 0.51 | 1.79   | 0.68 | 2.15   | 0.65 | 2.46    | 0.69 |
| 39                   | 1.81          | 0.24 | 2.14   | 0.27 | 2.62   | 0.21 | 4.08    | 0.16 |
| 40                   | 1.42          | 0.25 | 1.65   | 0.25 | 2.12   | 0.24 | 3.48    | 0.28 |
| 41                   | 1.11          | 0.53 | 1.33   | 0.58 | 1.76   | 0.68 | 2.72    | 0.12 |
| 42                   | 2.14          | 0.04 | 2.63   | 0.13 | 2.77   | 0.03 | 3.31    | 0.04 |
| 43                   | 2.75          | 0.04 | 3.15   | 0.02 | 3.35   | 0.04 | 3.86    | 0.07 |
| 44                   | 3.17          | 0.13 | 3.70   | 0.13 | 3.99   | 0.12 | 4.79    | 0.14 |
| 45                   | 2.69          | 0.10 | 3.17   | 0.07 | 3.71   | 0.08 | 4.41    | 0.10 |

| peptide # | 1 min | SD   | 10 min | SD   | 30 min | SD   | 120 min | SD   |
|-----------|-------|------|--------|------|--------|------|---------|------|
| 46        | 1.58  | 0.09 | 1.67   | 0.07 | 1.87   | 0.09 | 2.15    | 0.05 |
| 47        | 2.43  | 0.01 | 2.83   | 0.02 | 3.29   | 0.06 | 3.70    | 0.02 |
| 48        | 1.88  | 0.12 | 2.19   | 0.13 | 2.43   | 0.15 | 3.39    | 0.11 |
| 49        | 1.96  | 0.68 | 2.29   | 0.67 | 2.80   | 0.71 | 3.46    | 0.63 |
| 50        | 2.34  | 0.19 | 2.62   | 0.18 | 2.99   | 0.22 | 3.94    | 0.19 |
| 51        | 1.09  | 0.06 | 1.33   | 0.03 | 1.58   | 0.10 | 2.23    | 0.15 |
| 52        | 0.71  | 0.04 | 0.76   | 0.04 | 0.97   | 0.09 | 1.65    | 0.05 |
| 53        | 0.96  | 0.10 | 1.12   | 0.05 | 1.26   | 0.08 | 2.00    | 0.14 |
| 54        | 6.77  | 0.05 | 6.99   | 0.07 | 7.46   | 0.07 | 8.58    | 0.17 |
| 55        | 4.83  | 0.10 | 5.22   | 0.06 | 5.57   | 0.06 | 6.16    | 0.07 |
| 56        | 5.03  | 0.02 | 5.22   | 0.04 | 5.45   | 0.04 | 5.82    | 0.07 |
| 57        | 3.23  | 0.05 | 3.46   | 0.03 | 3.56   | 0.05 | 3.76    | 0.04 |
| 58        | 0.71  | 0.03 | 0.81   | 0.11 | 0.88   | 0.19 | 1.28    | 0.09 |
| 59        | 0.69  | 0.08 | 0.79   | 0.06 | 1.03   | 0.08 | 1.62    | 0.08 |
| 60        | 7.20  | 0.15 | 7.35   | 0.08 | 7.52   | 0.11 | 7.97    | 0.14 |
| 61        | 1.40  | 0.05 | 1.72   | 0.12 | 1.91   | 0.11 | 2.44    | 0.04 |
| 62        | 6.65  | 0.03 | 6.75   | 0.05 | 6.93   | 0.04 | 7.15    | 0.03 |
| 63        | 0.90  | 0.06 | 1.12   | 0.06 | 1.70   | 0.06 | 2.90    | 0.08 |
| 64        | 1.69  | 0.17 | 2.20   | 0.04 | 3.30   | 0.07 | 4.80    | 0.05 |
| 65        | 1.85  | 0.65 | 2.43   | 0.53 | 3.79   | 0.57 | 5.42    | 0.35 |
| 66        | 2.04  | 0.51 | 2.64   | 0.55 | 4.15   | 0.34 | 5.75    | 0.17 |
| 67        | 1.16  | 0.26 | 1.24   | 0.24 | 1.53   | 0.20 | 2.28    | 0.11 |
| 68        | 1.28  | 0.06 | 1.70   | 0.08 | 2.77   | 0.04 | 4.15    | 0.08 |
| 69        | 1.75  | 0.37 | 2.41   | 0.42 | 3.66   | 0.41 | 5.26    | 0.14 |
| 70        | 1.03  | 0.04 | 1.46   | 0.08 | 2.19   | 0.02 | 2.66    | 0.06 |
| 71        | 1.51  | 0.68 | 2.06   | 0.81 | 2.85   | 0.71 | 3.61    | 0.67 |
| 72        | 5.13  | 0.09 | 6.48   | 0.18 | 7.99   | 0.19 | 8.79    | 0.31 |
| 73        | 7.38  | 0.22 | 9.82   | 0.23 | 11.84  | 0.21 | 13.24   | 0.16 |
| 74        | 0.98  | 0.12 | 1.42   | 0.12 | 2.07   | 0.13 | 2.50    | 0.12 |
| 75        | 3.59  | 0.47 | 3.97   | 0.49 | 4.58   | 0.49 | 4.60    | 0.56 |
| 76        | 5.00  | 0.09 | 6.42   | 0.04 | 7.40   | 0.03 | 8.29    | 0.05 |
| 77        | 1.73  | 0.08 | 2.13   | 0.06 | 2.52   | 0.10 | 2.91    | 0.09 |
| 78        | 3.86  | 0.07 | 4.73   | 0.09 | 5.07   | 0.19 | 5.40    | 0.26 |
| 79        | 1.56  | 0.70 | 2.03   | 0.64 | 2.08   | 0.65 | 2.46    | 0.75 |
| 80        | 1.64  | 0.17 | 2.06   | 0.18 | 3.39   | 0.17 | 5.56    | 0.23 |
| 81        | 1.71  | 0.03 | 2.03   | 0.02 | 2.97   | 0.08 | 4.53    | 0.08 |
| 82        | 1.80  | 0.18 | 2.25   | 0.14 | 3.37   | 0.16 | 5.10    | 0.31 |
| 83        | 1.05  | 0.03 | 1.95   | 0.03 | 3.14   | 0.02 | 4.78    | 0.03 |
| 84        | 0.98  | 0.03 | 1.78   | 0.01 | 2.82   | 0.02 | 4.32    | 0.05 |
| 85        | 0.83  | 0.06 | 1.47   | 0.11 | 2.36   | 0.10 | 3.66    | 0.15 |
